# Supplementary material
Source: publisher figshare collection journal article supplement (https://acs.figshare.com/ndownloader/files/3902170)

## Supporting Information

### Base Pair Fraying in Molecular Dynamics Simulations of DNA and RNA

Marie Zgarbová<sup>1</sup>, Michal Otyepka<sup>1,2</sup>, Jiří Šponer<sup>1,2</sup>, Filip Lankaš<sup>3</sup>, Petr Jurečka<sup>1\*</sup>

<sup>1</sup> *Regional Centre of Advanced Technologies and Materials, Department of Physical Chemistry, Faculty of Science, Palacky University, 17. listopadu 12, 77146 Olomouc, Czech Republic*

<sup>2</sup> *Institute of Biophysics, Academy of Sciences of the Czech Republic, Královopolská 135, 612 65 Brno, Czech Republic*

<sup>3</sup> *Institute of Organic Chemistry and Biochemistry, Academy of Sciences of the Czech Republic, Flemingovo nám. 2, 166 10 Prague, Czech Republic*



## 1) Simulations of DD dodecamer

**Figure S1.** Fraying of the C1-G24 (top) and G12-C13 (bottom) terminal base pairs in MD simulation of the DD dodecamer with the ff99bsc0 force field (10  $\mu$ s, TIP3P) characterized by the RMSD of the terminal pairs and torsion angles  $\chi$  for the terminal residues (gray – C1, C13; light blue – G12, G24). The colors in the RMSD plot correspond to different end structures: WC (black), tWC/SE (green), distorted WC (violet), ‘CH’/Ho (brown), stacked (blue), frayed (red) and 5’C adhered to the major groove, 5’C-MG (yellow) and other (tan).

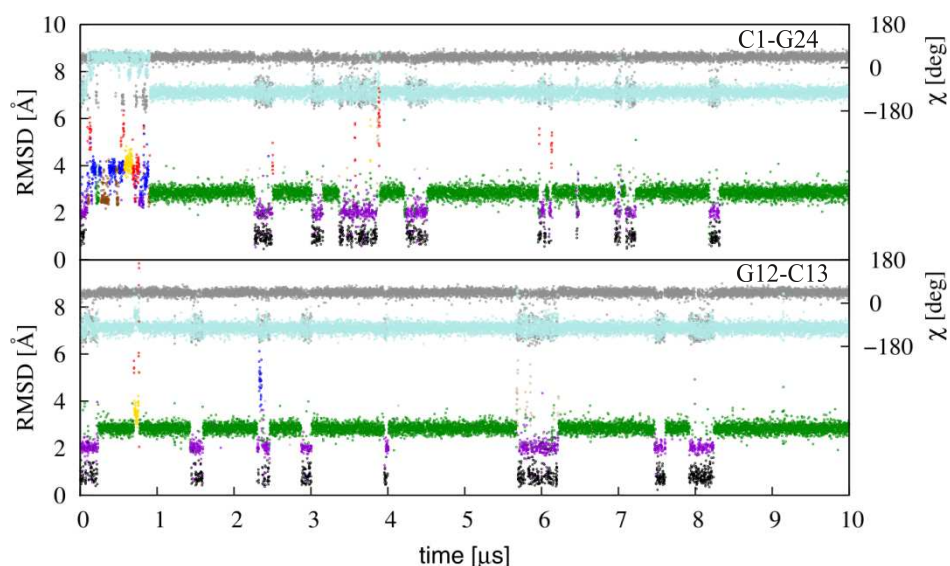

**Figure S2.** Fraying of the C1-G24 (top) and G12-C13 (bottom) terminal base pairs in MD simulation of the DD dodecamer with the ff99bsc0 $\chi_{OL4}$  force field (5  $\mu$ s, TIP3P) characterized by the RMSD of the terminal pairs and torsion angles  $\chi$  for the terminal residues (gray – C1, C13; light blue – G12, G24). The colors in the RMSD plot correspond to different end structures: WC (black), tWC/SE (green), distorted WC (violet), ‘CH’/Ho (brown), stacked (blue), frayed (red) and 5’C adhered to the major groove, 5’C-MG (yellow) and other (tan).

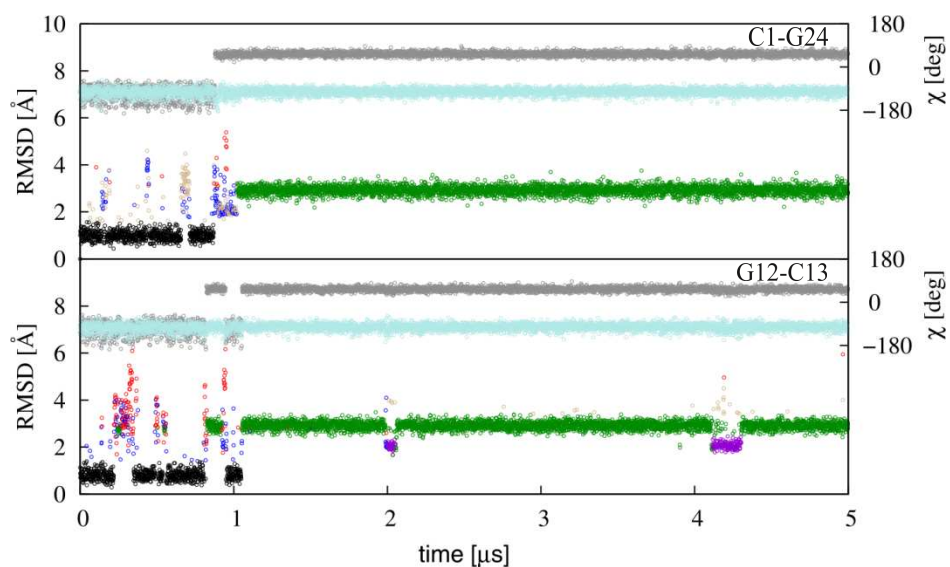



## 2) Additional DNA sequences terminated with the CG//CG step

**Figure S3.** Fraying in the A6 sequence (PDB ID 1D89) with the ff99bsc0 force field. Opening of the C1-G24 (top) and G12-C13 (bottom) terminal base pair in MD simulation of A6 structure (1  $\mu$ s, TIP3P water model, neutralizing  $\text{Na}^+$ ). Opening is characterized by the RMSD of the terminal pairs, and torsion angle  $\chi$  for the terminal residues (gray – terminal cytosines C1, C13; light blue – terminal guanines G24, G12). The colors in the RMSD plot correspond to different end structures: frayed (red), stacked structure (blue), tWC/SE (green), distorted WC (violet), and 5'C MG (yellow).

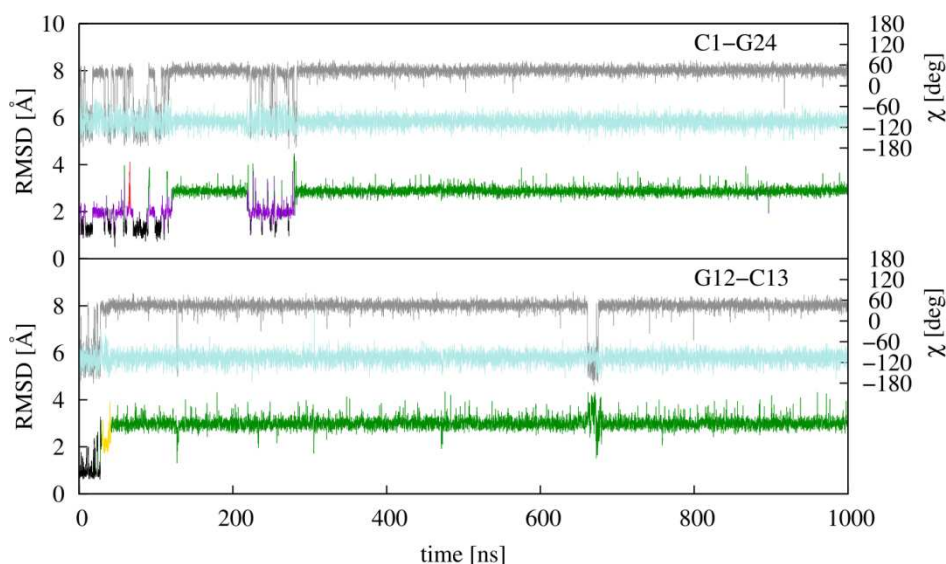

**Figure S4.** Fraying in the 3AT sequence with the ff99bsc0 force field. Opening of the C1-G24 (top) and G12-C13 (bottom) terminal base pair in MD simulation of 3AT structure (1  $\mu$ s, TIP3P water model, neutralizing  $\text{Na}^+$ ). Opening is characterized by the RMSD of the terminal pairs and torsion angle  $\chi$  for the terminal residues (gray – terminal cytosines C1, C13; light blue – terminal guanines G24, G12). The colors in the RMSD plot correspond to different end structures: frayed (red), stacked structure (blue), tWC/SE (green), and distorted WC (violet).

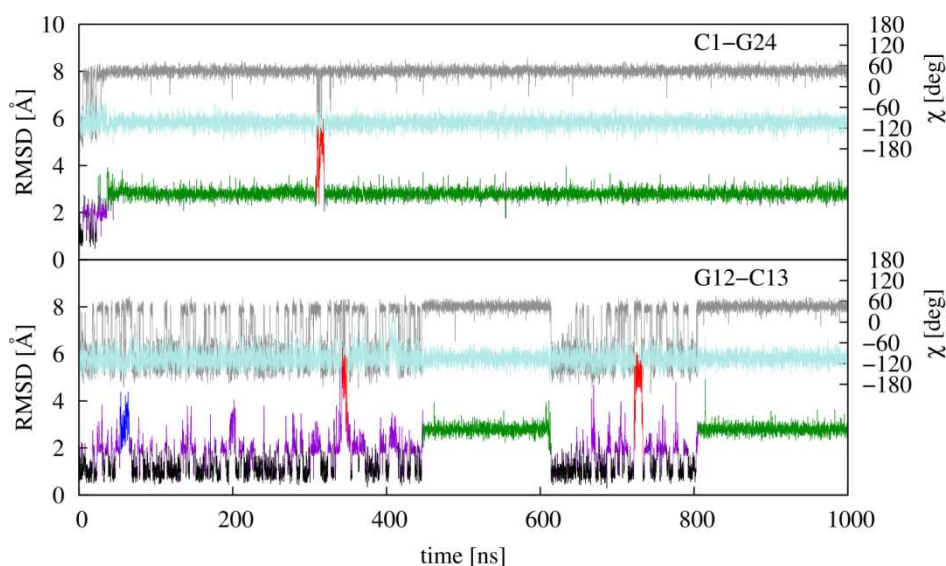



### 3) Influence of Neighboring Base Pairs - sequences terminated with CC//GG and GC//GC steps

**Figure S5.** Fraying in the 5C5G sequence with the ff99bsc0 force field. Opening of the C1-G20 (top) and G10-C11 (bottom) terminal base pair in MD simulation of 5C5G structure (1  $\mu$ s, TIP3P water model, neutralizing  $\text{Na}^+$ ). Opening is characterized by the RMSD of the terminal pairs, and torsion angle  $\chi$  for the terminal residues (gray – terminal cytosines C1, C11; light blue – terminal guanines G20, G10). The colors in the RMSD plot correspond to different end structures: frayed (red), stacked structure (blue), tWC/SE (green), and distorted WC (violet).

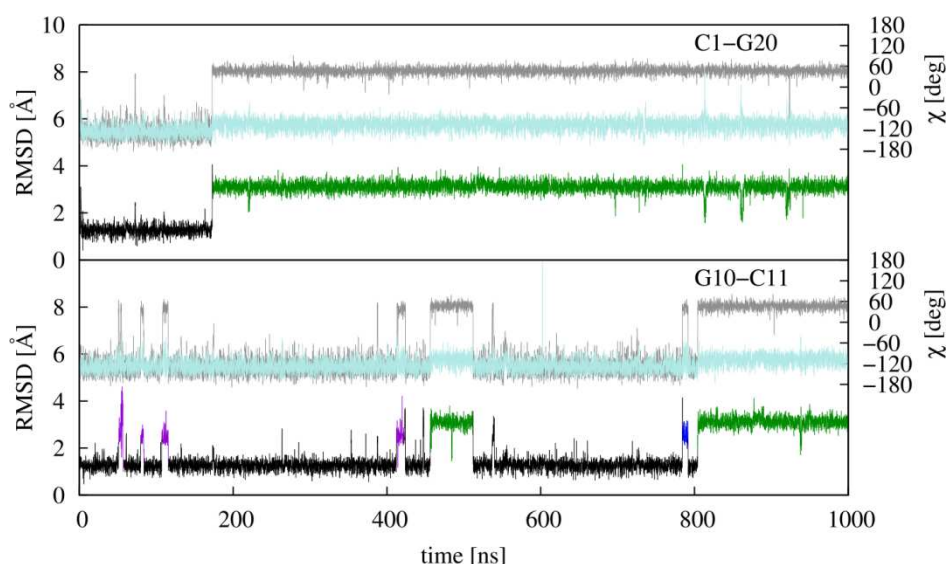

**Figure S6.** Fraying in the d(GCCAAGAAGCAGGAGTGGC)<sub>2</sub> sequence with the ff99bsc0 force field. Opening of the G1-C38 (top) and C19-G20 (bottom) terminal base pair in MD simulation of d(GCCAAGAAGCAGGAGTGGC)<sub>2</sub> structure (1  $\mu$ s, SPC/E water model, 150 mM KCl). Opening is characterized by the RMSD of the terminal pairs, and torsion angle  $\chi$  for the terminal residues (gray – terminal guanines G1, G20; light blue – terminal cytosine C38, C19). The colors in the RMSD plot correspond to different end structures: WC (black), distorted WC (violet), frayed (red), 3'C adhered to the major groove, 3'C-MG (yellow).

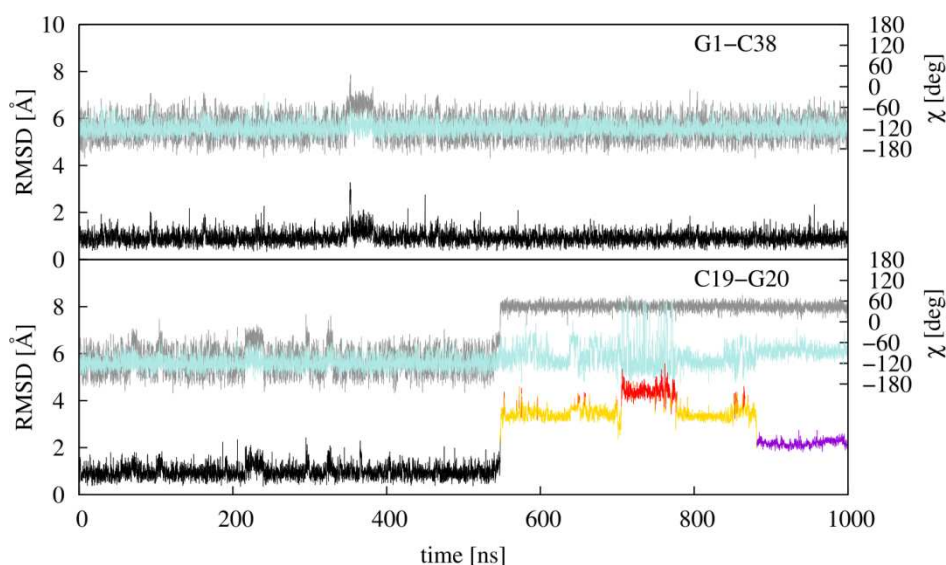



#### 4) AU Terminated RNA Duplex

**Figure S7.** Ladder-like structure formed in ff99bsc0 simulation of 1RNA after 80 ns of MD simulation. An example of a non-canonical terminal motif is shown at the lower end of the duplex.

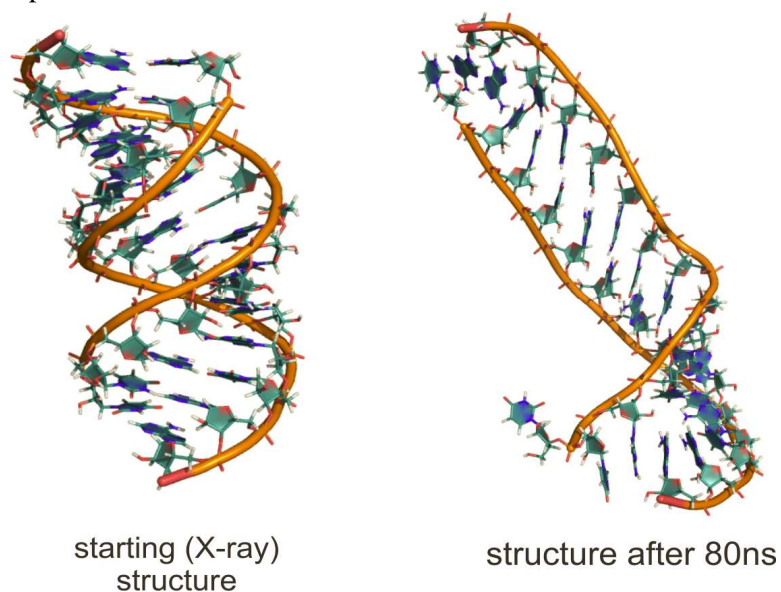

#### 5) Influence of Water Model and Salt Concentration

**Figure S8.** Fraying of the terminal base pairs in MD simulation of the DD dodecamer with the ff99bsc0 force field (500 ns, SPC/E) characterized by the RMSD of the terminal pairs and torsion angles  $\chi$  for the terminal residues (gray – C1, C13; light blue – G12, G24). The colors in the RMSD plot correspond to different end structures: WC (black), tWC/SE (green), distorted WC (violet), stacked (blue), and frayed (red).

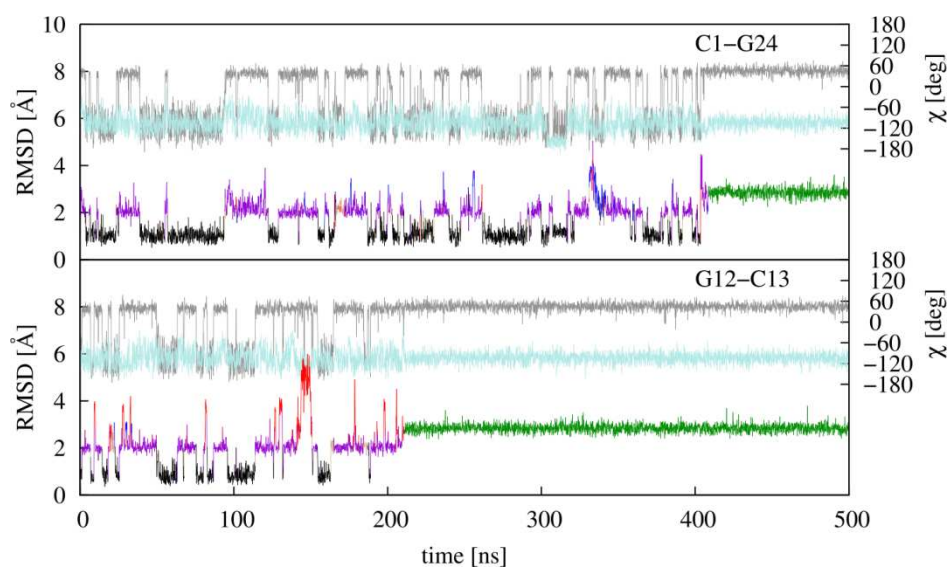



**Figure S9.** Fraying of the C1-G24 and G12-C13 terminal base pairs in MD simulation of the DD dodecamer with the ff99bsc0 force field (2  $\mu$ s, SPC/E, 150 mM KCl) characterized by the RMSD of the terminal pairs and torsion angles  $\chi$  for the terminal residues (gray – C1, C13; light blue – G12, G24). The colors in the RMSD plot correspond to different end structures: WC (black), tWC/SE (green), distorted WC (violet), stacked (blue), frayed (red) and other (tan).

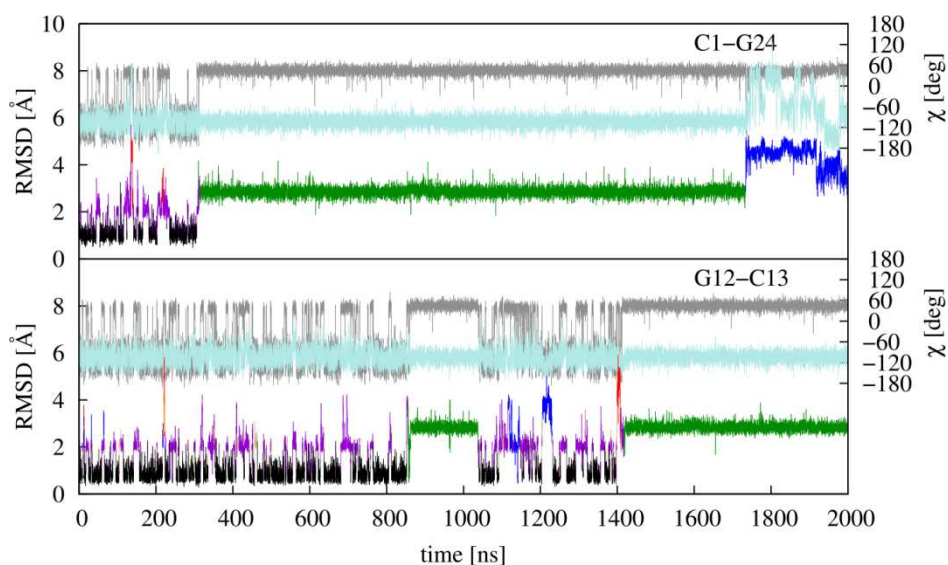

**Figure S10.** Fraying of the C1-G24 and G12-C13 terminal base pairs in MD simulation of the DD dodecamer with the ff99bsc0 $\chi_{OL4}$  force field (1.5  $\mu$ s, SPC/E, 150 mM KCl) characterized by the RMSD of the terminal pairs and torsion angles  $\chi$  for the terminal residues (gray – C1, C13; light blue – G12, G24). The colors in the RMSD plot correspond to different end structures: WC (black), tWC/SE (green), stacked (blue), frayed (red) and 5'C adhered to the major groove, 5'C-MG (yellow) and other (tan).

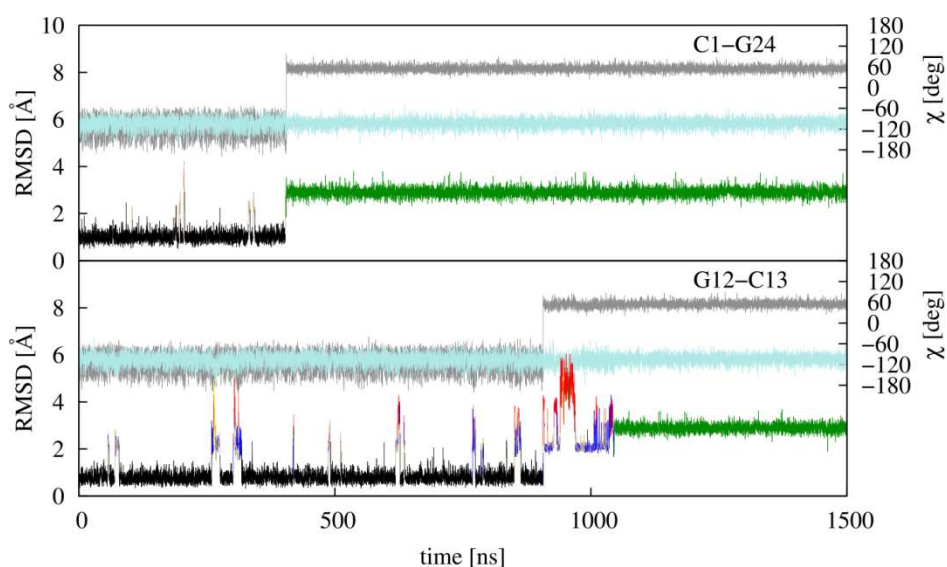

Supplement: Supplementary file 1 [file 3902170]
